# Supplementary material for: Sugar Concentration, Nitrogen Availability, and Phylogenetic Factors Determine the Ability of Acinetobacter spp. and Rosenbergiella spp. to Grow in Floral Nectar
Source: PubMed Central journal article supplement (PMC10293439; doi:10.1007/s00248-022-02088-4), 2022-08-05
Supplement: 248_2022_2088_MOESM2_ESM.pdf [file 248_2022_2088_MOESM2_ESM.pdf]

**SUPPLEMENTARY TABLES**

**Table S1.** Details of the *Acinetobacter* isolates characterized in this study ( $n = 43$ ).

| <b>Species<sup>a</sup></b> | <b>Isolate name</b> | <b>Origin</b>    | <b>Host organism</b>                      | <b>Sampling location</b>            | <b>Year of isolation</b>         | <b>Isolate donor(s)<sup>b</sup></b> | <b><i>rpoB</i> sequence type</b> | <b><i>rpoB</i> sequence (GenBank accession no.)</b> |
|----------------------------|---------------------|------------------|-------------------------------------------|-------------------------------------|----------------------------------|-------------------------------------|----------------------------------|-----------------------------------------------------|
| <i>A. boissieri</i>        | S14                 | Floral nectar    | <i>Erophaca baetica</i> (Fabaceae)        | Hinojos, Huelva, Spain              | 2011                             | SAP                                 | ST15A                            | JQ771150                                            |
|                            | S18                 | Floral nectar    | <i>Anchusa calcarea</i> (Boraginaceae)    | Hinojos, Huelva, Spain              | 2011                             | SAP                                 | ST17A                            | MN315332                                            |
|                            | S21                 | Floral nectar    | <i>Salvia rosmarinus</i> (Lamiaceae)      | Hinojos, Huelva, Spain              | 2011                             | SAP                                 | ST17A                            | JQ771153                                            |
|                            | S27                 | Floral nectar    | <i>Fritillaria lusitanica</i> (Liliaceae) | Hinojos, Huelva, Spain              | 2011                             | SAP                                 | ST14A                            | MN315333                                            |
|                            | S30                 | Floral nectar    | <i>Erophaca baetica</i> (Fabaceae)        | Hinojos, Huelva, Spain              | 2011                             | SAP                                 | ST16A                            | MN315336                                            |
|                            | S31                 | Floral nectar    | <i>Lavandula stoechas</i> (Lamiaceae)     | Hinojos, Huelva, Spain              | 2011                             | SAP                                 | ST17A                            | JQ771156                                            |
|                            | S318                | Floral nectar    | <i>Salvia rosmarinus</i> (Lamiaceae)      | Hinojos, Huelva, Spain              | 2011                             | SAP                                 | ST18A                            | JQ771151                                            |
|                            | S319                | Floral nectar    | <i>Salvia rosmarinus</i> (Lamiaceae)      | Hinojos, Huelva, Spain              | 2011                             | SAP                                 | ST18A                            | JQ771152                                            |
|                            | <i>A. nectaris</i>  | B3-04            | Honeybee (mouth)                          | <i>Apis mellifera</i> (Hymenoptera) | Stanford campus, California, USA | 2018                                | TF, SAP                          | ST08A                                               |
| B3-05                      |                     | Honeybee (mouth) | <i>Apis mellifera</i> (Hymenoptera)       | Stanford campus, California, USA    | 2018                             | TF, SAP                             | ST08A                            | MN315297                                            |
| B3-06                      |                     | Honeybee (mouth) | <i>Apis mellifera</i> (Hymenoptera)       | Stanford campus, California, USA    | 2018                             | TF, SAP                             | ST08A                            | MN315298                                            |
| B3-09                      |                     | Honeybee (mouth) | <i>Apis mellifera</i> (Hymenoptera)       | Stanford campus, California, USA    | 2018                             | TF, SAP                             | ST04A                            | MN315301                                            |

|       |                 |                                               |                                        |      |         |       |          |
|-------|-----------------|-----------------------------------------------|----------------------------------------|------|---------|-------|----------|
| B3-10 | Honeybee (crop) | <i>Apis mellifera</i><br>(Hymenoptera)        | Stanford campus,<br>California, USA    | 2018 | TF, SAP | ST08A | MN315302 |
| B3-11 | Honeybee (crop) | <i>Apis mellifera</i><br>(Hymenoptera)        | Stanford campus,<br>California, USA    | 2018 | TF, SAP | ST08A | MN315303 |
| B3-12 | Honeybee (crop) | <i>Apis mellifera</i><br>(Hymenoptera)        | Stanford campus,<br>California, USA    | 2018 | TF, SAP | ST09A | MN315304 |
| B3-13 | Honeybee (crop) | <i>Apis mellifera</i><br>(Hymenoptera)        | Stanford campus,<br>California, USA    | 2018 | TF, SAP | ST09A | MN315305 |
| B3-16 | Honeybee (crop) | <i>Apis mellifera</i><br>(Hymenoptera)        | Stanford campus,<br>California, USA    | 2018 | TF, SAP | ST09A | MN315307 |
| B3-17 | Honeybee (crop) | <i>Apis mellifera</i><br>(Hymenoptera)        | Stanford campus,<br>California, USA    | 2018 | TF, SAP | ST08A | MN315308 |
| EC30  | Floral nectar   | <i>Epilobium canum</i><br>(Onagraceae)        | UC Davis campus,<br>California, USA    | 2015 | RV, MM  | ST12A | MN315311 |
| EC31  | Floral nectar   | <i>Epilobium canum</i><br>(Onagraceae)        | UC Davis campus,<br>California, USA    | 2015 | RV, MM  | ST06A | MN315312 |
| EC32  | Floral nectar   | <i>Epilobium canum</i><br>(Onagraceae)        | UC Davis campus,<br>California, USA    | 2015 | RV, MM  | ST12A | MN315313 |
| EC33  | Floral nectar   | <i>Epilobium canum</i><br>(Onagraceae)        | UC Davis campus,<br>California, USA    | 2015 | RV, MM  | ST06A | MN315314 |
| EC43  | Floral nectar   | <i>Epilobium canum</i><br>(Onagraceae)        | UC Davis campus,<br>California, USA    | 2015 | RV, MM  | ST05A | MN315317 |
| EC46  | Floral nectar   | <i>Epilobium canum</i><br>(Onagraceae)        | UC Davis campus,<br>California, USA    | 2015 | RV, MM  | ST05A | MN315320 |
| EC47  | Floral nectar   | <i>Epilobium canum</i><br>(Onagraceae)        | UC Davis campus,<br>California, USA    | 2015 | RV, MM  | ST12A | MN315321 |
| S165  | Floral nectar   | <i>Iris xiphium</i><br>(Iridaceae)            | Hinojos, Huelva, Spain                 | 2011 | SAP     | ST13A | MN315331 |
| S301  | Floral nectar   | <i>Buddleja davidii</i><br>(Scrophulariaceae) | Mechelen, Antwerp<br>province, Belgium | 2017 | SAP     | ST03A | MN315337 |

|      |               |                                               |                                     |      |     |       |          |
|------|---------------|-----------------------------------------------|-------------------------------------|------|-----|-------|----------|
| S302 | Floral nectar | <i>Buddleja davidii</i><br>(Scrophulariaceae) | Mechelen, Antwerp province, Belgium | 2017 | SAP | ST02A | MN315338 |
| S304 | Floral nectar | <i>Buddleja davidii</i><br>(Scrophulariaceae) | Mechelen, Antwerp province, Belgium | 2017 | SAP | ST03A | MN315339 |
| S306 | Floral nectar | <i>Buddleja davidii</i><br>(Scrophulariaceae) | Mechelen, Antwerp province, Belgium | 2017 | SAP | ST02A | MN315340 |
| S313 | Floral nectar | <i>Erophaca baetica</i><br>(Fabaceae)         | Hinojos, Huelva, Spain              | 2011 | SAP | ST10A | JQ771145 |
| S315 | Floral nectar | <i>Gladiolus illyricus</i><br>(Iridaceae)     | Hinojos, Huelva, Spain              | 2011 | SAP | ST11A | JQ771147 |
| S316 | Floral nectar | <i>Lonicera implexa</i><br>(Caprifoliaceae)   | Hinojos, Huelva, Spain              | 2011 | SAP | ST01A | JQ771148 |
| S317 | Floral nectar | <i>Lonicera implexa</i><br>(Caprifoliaceae)   | Hinojos, Huelva, Spain              | 2011 | SAP | ST01A | JQ771149 |
| S325 | Floral nectar | <i>Linaria vulgaris</i><br>(Plantaginaceae)   | Mechelen, Antwerp province, Belgium | 2017 | SAP | ST07A | MN315341 |
| S329 | Floral nectar | <i>Buddleja davidii</i><br>(Scrophulariaceae) | Mechelen, Antwerp province, Belgium | 2017 | SAP | ST02A | MN315342 |
| S330 | Floral nectar | <i>Buddleja davidii</i><br>(Scrophulariaceae) | Mechelen, Antwerp province, Belgium | 2017 | SAP | ST02A | MN315343 |
| S331 | Floral nectar | <i>Buddleja davidii</i><br>(Scrophulariaceae) | Mechelen, Antwerp province, Belgium | 2017 | SAP | ST02A | MN315344 |
| S332 | Floral nectar | <i>Buddleja davidii</i><br>(Scrophulariaceae) | Mechelen, Antwerp province, Belgium | 2017 | SAP | ST02A | MN315345 |
| S333 | Floral nectar | <i>Buddleja davidii</i><br>(Scrophulariaceae) | Mechelen, Antwerp province, Belgium | 2017 | SAP | ST02A | MN315346 |
| S334 | Floral nectar | <i>Buddleja davidii</i><br>(Scrophulariaceae) | Mechelen, Antwerp province, Belgium | 2017 | SAP | ST02A | MN315347 |
| S335 | Floral nectar | <i>Buddleja davidii</i><br>(Scrophulariaceae) | Mechelen, Antwerp province, Belgium | 2017 | SAP | ST02A | MN315348 |

---

|      |               |                                               |                                        |      |     |       |          |
|------|---------------|-----------------------------------------------|----------------------------------------|------|-----|-------|----------|
| S336 | Floral nectar | <i>Buddleja davidii</i><br>(Scrophulariaceae) | Mechelen, Antwerp<br>province, Belgium | 2017 | SAP | ST02A | MN315349 |
|------|---------------|-----------------------------------------------|----------------------------------------|------|-----|-------|----------|

---

<sup>a</sup> As determined by BLASTn searches of *rpoB* sequences against the GenBank databases.

<sup>b</sup> Isolate donors: MM, Megan Morris (Stanford University, USA); RV, Rachel Vannette (UC Davis, USA); SAP, Sergio Álvarez-Pérez (Complutense University of Madrid, Spain); TF, Tadashi Fukami (Stanford University, USA). Tryptone soy agar was used for the isolation and subculturing of all isolates.

**Table S2.** Details of the *Rosenbergiella* isolates characterized in this study ( $n = 45$ ).

| Species <sup>a</sup>       | Isolate name <sup>b</sup> | Origin        | Host organism                                     | Sampling location                                    | Year of isolation | Isolate donor(s) <sup>c</sup> | Sequence type | GenBank accession numbers <sup>d</sup> |
|----------------------------|---------------------------|---------------|---------------------------------------------------|------------------------------------------------------|-------------------|-------------------------------|---------------|----------------------------------------|
| <i>R. australiborealis</i> | S264 <sup>T</sup>         | Floral nectar | <i>Protea roupelliae</i><br>(Proteaceae)          | Mount Gilboa,<br>KwaZulu-Natal, South<br>Africa      | 2011              | CdV, SAP                      | ST23R         | KF876198,<br>KF876208,<br>KF876215     |
|                            | S265                      | Floral nectar | <i>Protea roupelliae</i><br>(Proteaceae)          | Mount Gilboa,<br>KwaZulu-Natal, South<br>Africa      | 2011              | CdV, SAP                      | ST23R         | KF876201,<br>KF876209,<br>KF876216     |
|                            | S266                      | Floral nectar | <i>Protea subvestita</i><br>(Proteaceae)          | Sani Pass, KwaZulu-<br>Natal, South Africa           | 2011              | CdV, SAP                      | ST24R         | KF876199,<br>KF876210,<br>KF876217     |
| <i>R. collisarenosi</i>    | S260 <sup>T</sup>         | Floral nectar | <i>Epipactis palustris</i><br>(Orchidaceae)       | Ter Yde, Oostduinkerke,<br>West Flanders, Belgium    | 2012              | BL, HJ                        | ST22R         | KF876193,<br>KF876202,<br>KF876214     |
|                            | JB25                      | Floral nectar | <i>Metrosideros<br/>polymorpha</i><br>(Myrtaceae) | Hawai'i Volcanoes<br>National Park, Hawaii,<br>USA   | 2013              | RRJ                           | ST19R         | MT354630,<br>MT354669,<br>MT354708     |
|                            | S147                      | Floral nectar | <i>Phlomis purpurea</i><br>(Lamiaceae)            | P. N. S <sup>a</sup> Hornachuelos,<br>Córdoba, Spain | 2011              | SAP                           | ST21R         | MT354633,<br>MT354672,<br>MT354711     |
|                            | S294                      | Floral nectar | <i>Buddleja davidii</i><br>(Scrophulariaceae)     | Mechelen, Antwerp<br>province, Belgium               | 2017              | SAP                           | ST20R         | MT354634,<br>MT354673,<br>MT354712     |
|                            | S7                        | Floral nectar | <i>Narcissus papyraceus</i><br>(Amaryllidaceae)   | Hinojos, Huelva, Spain                               | 2011              | SAP                           | ST19R         | MT354631,<br>MT354670,<br>MT354709     |
|                            | S99                       | Floral nectar | <i>Iris xiphium</i><br>(Iridaceae)                | Hinojos, Huelva, Spain                               | 2011              | SAP                           | ST18R         | MT354632,<br>MT354671,<br>MT354710     |

|                       |                   |               |                                                                 |                                                                         |      |         |       |                                    |
|-----------------------|-------------------|---------------|-----------------------------------------------------------------|-------------------------------------------------------------------------|------|---------|-------|------------------------------------|
| <i>R. epipactidis</i> | S256 <sup>T</sup> | Floral nectar | <i>Epipactis palustris</i><br>(Orchidaceae)                     | Dune du Perroquet,<br>Bray-Dunes, France                                | 2012 | BL, HJ  | ST03R | KF876195,<br>KF876204,<br>KF876212 |
|                       | FR72              | Floral nectar | <i>Diplacus (Mimulus)</i><br><i>aurantiacus</i><br>(Phrymaceae) | Jasper Ridge Biological<br>Preserve, Stanford,<br>California, USA       | 2017 | KT, TF  | ST10R | MT354639,<br>MT354678,<br>MT354717 |
|                       | JB02              | Floral nectar | <i>Metrosideros</i><br><i>polymorpha</i><br>(Myrtaceae)         | Hawai'i Volcanoes<br>National Park, Hawaii,<br>USA                      | 2013 | RRJ     | ST09R | MT354640,<br>MT354679,<br>MT354718 |
|                       | JB21              | Floral nectar | <i>Metrosideros</i><br><i>polymorpha</i><br>(Myrtaceae)         | Hawai'i Volcanoes<br>National Park, Hawaii,<br>USA                      | 2013 | RRJ     | ST07R | MT354642,<br>MT354681,<br>MT354720 |
|                       | JR114             | Floral nectar | <i>Diplacus (Mimulus)</i><br><i>aurantiacus</i><br>(Phrymaceae) | Jasper Ridge Biological<br>Preserve, Stanford,<br>California, USA       | 2018 | TF, SAP | ST10R | MT354643,<br>MT354682,<br>MT354721 |
|                       | K1916             | Floral nectar | <i>Diplacus (Mimulus)</i><br><i>aurantiacus</i><br>(Phrymaceae) | Jasper Ridge Biological<br>Preserve, Stanford,<br>California, USA       | 2017 | KT, TF  | ST06R | MT354644,<br>MT354683,<br>MT354722 |
|                       | K24               | Floral nectar | <i>Eurya japonica</i><br>(Pentaphylacaceae)                     | Takaike Kozagawacho<br>Higashimurogun,<br>Wakayama prefecture,<br>Japan | 2016 | KT, TF  | ST11R | MT354645,<br>MT354684,<br>MT354723 |
|                       | K264              | Floral nectar | <i>Diplacus (Mimulus)</i><br><i>aurantiacus</i><br>(Phrymaceae) | Jasper Ridge Biological<br>Preserve, Stanford,<br>California, USA       | 2017 | KT, TF  | ST05R | MT354646,<br>MT354685,<br>MT354724 |
|                       | K265              | Floral nectar | <i>Diplacus (Mimulus)</i><br><i>aurantiacus</i><br>(Phrymaceae) | Jasper Ridge Biological<br>Preserve, Stanford,<br>California, USA       | 2017 | KT, TF  | ST05R | MT354647,<br>MT354686,<br>MT354725 |
|                       | K371              | Floral nectar | <i>Diplacus (Mimulus)</i><br><i>aurantiacus</i><br>(Phrymaceae) | Jasper Ridge Biological<br>Preserve, Stanford,<br>California, USA       | 2017 | KT, TF  | ST06R | MT354648,<br>MT354687,<br>MT354726 |

|                           |                  |                  |                                                    |                                                             |      |         |       |                              |
|---------------------------|------------------|------------------|----------------------------------------------------|-------------------------------------------------------------|------|---------|-------|------------------------------|
|                           | K372             | Floral nectar    | <i>Diplacus (Mimulus) aurantiacus</i> (Phrymaceae) | Jasper Ridge Biological Preserve, Stanford, California, USA | 2017 | KT, TF  | ST06R | MT354649, MT354688, MT354727 |
|                           | S50              | Floral nectar    | <i>Antirrhinum</i> sp. (Plantaginaceae)            | Barbate, Cádiz, Spain                                       | 2011 | SAP     | ST04R | MT354650, MT354689, MT354728 |
|                           | S55              | Floral nectar    | <i>Antirrhinum</i> sp. (Plantaginaceae)            | Barbate, Cádiz, Spain                                       | 2011 | SAP     | ST10R | MT354651, MT354690, MT354729 |
|                           | S67              | Floral nectar    | <i>Antirrhinum</i> sp. (Plantaginaceae)            | Barbate, Cádiz, Spain                                       | 2011 | SAP     | ST02R | MT354652, MT354691, MT354730 |
|                           | S68              | Floral nectar    | <i>Antirrhinum</i> sp. (Plantaginaceae)            | Barbate, Cádiz, Spain                                       | 2011 | SAP     | ST01R | MT354653, MT354692, MT354731 |
|                           | S76              | Floral nectar    | <i>Lathyrus</i> sp. (Fabaceae)                     | Barbate, Cádiz, Spain                                       | 2011 | SAP     | ST01R | MT354654, MT354693, MT354732 |
| ' <i>R. gaditana</i> '    | S61 <sup>T</sup> | Floral nectar    | <i>Antirrhinum</i> sp. (Plantaginaceae)            | Barbate, Cádiz, Spain                                       | 2011 | SAP     | ST17R | MT354635, MT354674, MT354713 |
|                           | S284             | Floral nectar    | <i>Echium</i> sp. (Boraginaceae)                   | Madrid, Spain                                               | 2017 | SAP     | ST17R | MT354636, MT354675, MT354714 |
|                           | S290             | Floral nectar    | <i>Echium</i> sp. (Boraginaceae)                   | Madrid, Spain                                               | 2017 | SAP     | ST17R | MT354637, MT354676, MT354715 |
| ' <i>R. metrosideri</i> ' | JB07             | Floral nectar    | <i>Metrosideros polymorpha</i> (Myrtaceae)         | Hawai'i Volcanoes National Park, Hawaii, USA                | 2013 | RRJ     | ST08R | MT354641, MT354680, MT354719 |
| <i>R. nectarea</i>        | B1A <sup>T</sup> | Honeybee (mouth) | <i>Apis mellifera</i>                              | Stanford campus, California, USA                            | 2018 | TF, SAP | ST14R | MT354655, MT354694, MT354733 |

---

|       |                     |                                               |                                          |      |         |       |                                    |
|-------|---------------------|-----------------------------------------------|------------------------------------------|------|---------|-------|------------------------------------|
| B3A   | Honeybee<br>(mouth) | <i>Apis mellifera</i>                         | Stanford campus,<br>California, USA      | 2018 | TF, SAP | ST15R | MT354656,<br>MT354695,<br>MT354734 |
| B4A   | Bumblebee<br>(gut)  | <i>Bombus</i> sp.                             | Stanford campus,<br>California, USA      | 2018 | TF, SAP | ST14R | MT354657,<br>MT354696,<br>MT354735 |
| B5A   | Honeybee<br>(mouth) | <i>Apis mellifera</i>                         | Stanford campus,<br>California, USA      | 2018 | TF, SAP | ST14R | MT354658,<br>MT354697,<br>MT354736 |
| FNA5  | Floral nectar       | <i>Buddleja davidii</i><br>(Scrophulariaceae) | Mechelen (Antwerp,<br>Belgium)           | 2017 | SAP     | ST16R | MT354659,<br>MT354698,<br>MT354737 |
| FR67  | Floral nectar       | <i>Buddleja davidii</i><br>(Scrophulariaceae) | Mechelen (Antwerp,<br>Belgium)           | 2017 | SAP     | ST16R | MT354660,<br>MT354699,<br>MT354738 |
| K1039 | Floral nectar       | <i>Buddleja davidii</i><br>(Scrophulariaceae) | Mechelen (Antwerp,<br>Belgium)           | 2017 | SAP     | ST16R | MT354661,<br>MT354700,<br>MT354739 |
| K353  | Floral nectar       | <i>Buddleja davidii</i><br>(Scrophulariaceae) | Mechelen (Antwerp,<br>Belgium)           | 2017 | SAP     | ST16R | MT354662,<br>MT354701,<br>MT354740 |
| M26   | Floral nectar       | <i>Erophaca baetica</i><br>(Fabaceae)         | Hinojos (Huelva, Spain)                  | 2011 | SAP     | ST16R | MT354663,<br>MT354702,<br>MT354741 |
| S255  | Floral nectar       | <i>Epipactis palustris</i><br>(Orchidaceae)   | Dune Dewulf,<br>Ghyvelde, France         | 2012 | BL, HJ  | ST13R | KF876194,<br>KF876203,<br>KF876211 |
| S258  | Floral nectar       | <i>Epipactis palustris</i><br>(Orchidaceae)   | Dune du Perroquet,<br>Bray-Dunes, France | 2012 | BL, HJ  | ST12R | KF876196,<br>KF876205,<br>KF876213 |
| S292  | Floral nectar       | <i>Symphytum officinale</i><br>(Boraginaceae) | Mechelen, Antwerp<br>province, Belgium   | 2017 | SAP     | ST16R | MT354664,<br>MT354703,<br>MT354742 |

---



|      |               |                                               |                                                       |      |        |       |                                    |
|------|---------------|-----------------------------------------------|-------------------------------------------------------|------|--------|-------|------------------------------------|
| S321 | Floral nectar | <i>Linaria vulgaris</i><br>(Scrophulariaceae) | Sint-Katelijne-Waver,<br>Antwerp province,<br>Belgium | 2017 | SAP    | ST16R | MT354665,<br>MT354704,<br>MT354743 |
| S32  | Floral nectar | <i>Linaria vulgaris</i><br>(Scrophulariaceae) | Sint-Katelijne-Waver,<br>Antwerp province,<br>Belgium | 2017 | SAP    | ST16R | MT354666,<br>MT354705,<br>MT354744 |
| S324 | Floral nectar | <i>Linaria vulgaris</i><br>(Scrophulariaceae) | Sint-Katelijne-Waver,<br>Antwerp province,<br>Belgium | 2017 | SAP    | ST16R | MT354667,<br>MT354706,<br>MT354745 |
| ST2  | Floral nectar | <i>Linaria vulgaris</i><br>(Scrophulariaceae) | Leuven-Heverlee,<br>Flemish Brabant,<br>Belgium       | 2013 | BL, HJ | ST16R | MT354668,<br>MT354707,<br>MT354746 |

<sup>a</sup> As determined by BLASTn searches of *atpD*, *gyrB*, and *rpoB* sequences against the GenBank databases. Species names pending of validation are indicated between quotation marks.

<sup>b</sup> T: type strain.

<sup>c</sup> Isolate donors: BL, Bart Lievens (KU Leuven, Belgium), CdV, Clara de Vega (University of Seville, Spain); HJ, Hans Jacquemyn (KU Leuven, Belgium); KT, Kaoru Tsuji (Kobe University, Japan); RRJ, Robert R. Junker (Philipps-University Marburg, Germany); SAP, Sergio Álvarez-Pérez (Complutense University of Madrid, Spain); TF, Tadashi Fukami (Stanford University, California, USA). Tryptone soy agar was used for the isolation and subculturing of all isolates.

<sup>d</sup> Accession numbers for the *atpD*, *gyrB*, and *rpoB* gene sequences (in this order).

**Table S3.** Overview of the optical density results obtained in the growth assays performed in this study.

| <b>Artificial nectar<sup>a</sup></b> | <b>OD (3 d)<sup>b</sup></b> | <b>OD (7 d)<sup>b</sup></b> | <b>Kept for analysis?<sup>c</sup></b> |
|--------------------------------------|-----------------------------|-----------------------------|---------------------------------------|
| snS                                  | -6·10 <sup>-4</sup> -0.037  | -0.002-0.031                | No                                    |
| sNS                                  | 0.038-0.381                 | 0.005-0.489                 | Yes                                   |
| SnS                                  | -0.003-0.002                | -0.015-0.005                | No                                    |
| SNS                                  | -0.003-0.078                | -0.009-0.071                | Yes                                   |
| snM                                  | -0.002-0.021                | -0.002-0.021                | No                                    |
| sNM                                  | 0.045-0.311                 | 0.067-0.401                 | Yes                                   |
| SnM                                  | -0.005-0.002                | -0.004-0.002                | No                                    |
| SNM                                  | -0.003-0.013                | -0.003-0.027                | No                                    |
| snH                                  | -0.003-0.013                | -0.012-0.014                | No                                    |
| sNH                                  | 0.043-0.266                 | 0.049-0.393                 | Yes                                   |
| SnH                                  | -0.004-0.002                | -0.009-0.002                | No                                    |
| SNH                                  | -0.005-0.001                | -0.018-0.001                | No                                    |

<sup>a</sup> Artificial nectar codes are as in Table 1.

<sup>b</sup> Range of average optical densities (OD) obtained after 3 and 7 days of incubation of test plates. See details in the main text.

<sup>c</sup> Tests yielding average OD values < 0.05 after 7 days of incubation for all isolates were not kept for detailed data analysis.

**Table S4.** Intraplate reproducibility of the growth assays performed in this study.

| <b>Incubation time</b> | <b>Artificial nectar<sup>a</sup></b> | <b>CCC estimate (95% CI)<sup>b</sup></b> |
|------------------------|--------------------------------------|------------------------------------------|
| 3 days                 | sNS                                  | 0.965 (0.935-0.981)                      |
|                        | SNS                                  | 0.985 (0.971-0.992)                      |
|                        | sNM                                  | 0.908 (0.833-0.950)                      |
|                        | sNH                                  | 0.775 (0.628-0.869)                      |
| 7 days                 | sNS                                  | 0.972 (0.948-0.985)                      |
|                        | SNS                                  | 0.964 (0.932-0.981)                      |
|                        | sNM                                  | 0.835 (0.712-0.909)                      |
|                        | sNH                                  | 0.725 (0.553-0.838)                      |

<sup>a</sup> Artificial nectar codes are as in Table 1.

<sup>b</sup> Lin's concordance correlation coefficient (CCC) for agreement on continuous measures (mean estimate and 95% confidence interval).  $n = 40$  in all cases.

**Table S5.** Model fitting results obtained for the growth performance of *Acinetobacter* and *Rosenbergiella* isolates, sequence types (STs), and species in different artificial nectars.

| Phylogenetic tree ( <i>N</i> ) <sup>a</sup> | Artificial nectar <sup>b</sup> | Evolutionary models <sup>c</sup> |                  |        |             |                  |                   |                    |        |             |
|---------------------------------------------|--------------------------------|----------------------------------|------------------|--------|-------------|------------------|-------------------|--------------------|--------|-------------|
|                                             |                                | Brownian motion                  | Pagel's $\delta$ | Drift  | Early burst | Pagel's $\kappa$ | Pagel's $\lambda$ | Ornstein-Uhlenbeck | Trend  | White noise |
| <i>Acinetobacter</i> isolates (45)          | SNS                            | <0.001                           | <0.001           | <0.001 | <0.001      | 0.729*           | 0.271             | <0.001             | <0.001 | <0.001      |
|                                             | sNH                            | <0.001                           | <0.001           | <0.001 | <0.001      | 0.307            | 0.693*            | <0.001             | <0.001 | <0.001      |
|                                             | sNM                            | <0.001                           | <0.001           | <0.001 | <0.001      | 0.925*           | 0.074             | <0.001             | <0.001 | 0.001       |
|                                             | sNS                            | <0.001                           | <0.001           | <0.001 | <0.001      | 0.138            | 0.862*            | <0.001             | <0.001 | <0.001      |
| <i>Acinetobacter</i> STs (18)               | SNS                            | <0.001                           | <0.001           | <0.001 | <0.001      | 0.380            | 0.618*            | <0.001             | <0.001 | 0.002       |
|                                             | sNH                            | <0.001                           | <0.001           | <0.001 | <0.001      | 0.661*           | 0.339             | <0.001             | <0.001 | <0.001      |
|                                             | sNM                            | <0.001                           | <0.001           | <0.001 | <0.001      | 0.900*           | 0.078             | <0.001             | <0.001 | 0.022       |
|                                             | sNS                            | <0.001                           | <0.001           | <0.001 | <0.001      | 0.136            | 0.843*            | <0.001             | <0.001 | 0.020       |
| <i>Rosenbergiella</i> isolates (47)         | SNS                            | <0.001                           | <0.001           | <0.001 | <0.001      | 0.877*           | 0.123             | <0.001             | <0.001 | <0.001      |
|                                             | sNH                            | <0.001                           | <0.001           | <0.001 | <0.001      | 1.000*           | <0.001            | <0.001             | <0.001 | <0.001      |
|                                             | sNM                            | <0.001                           | <0.001           | <0.001 | <0.001      | 1.000*           | <0.001            | <0.001             | <0.001 | <0.001      |
|                                             | sNS                            | <0.001                           | <0.001           | <0.001 | <0.001      | 0.068            | 0.932*            | <0.001             | <0.001 | <0.001      |
| <i>Rosenbergiella</i> STs (24)              | SNS                            | 0.020                            | 0.084            | 0.007  | 0.007       | 0.672*           | 0.161             | 0.016              | 0.028  | 0.003       |
|                                             | sNH                            | <0.001                           | <0.001           | <0.001 | <0.001      | 0.187            | 0.219             | <0.001             | <0.001 | 0.594*      |
|                                             | sNM                            | <0.001                           | <0.001           | <0.001 | <0.001      | 0.020            | 0.263             | <0.001             | <0.001 | 0.716*      |
|                                             | sNS                            | <0.001                           | <0.001           | <0.001 | <0.001      | 0.035            | 0.259             | <0.001             | <0.001 | 0.705*      |
| Species (8)                                 | SNS†                           | 0.060                            | 0.063            | 0.022  | 0.022       | 0.027            | 0.170             | 0.130              | 0.043  | 0.462       |
|                                             | sNH                            | 0.037                            | 0.042            | 0.014  | 0.014       | 0.030            | 0.198             | 0.100              | 0.027  | 0.538*      |
|                                             | sNM                            | <0.001                           | <0.001           | <0.001 | <0.001      | 0.038            | 0.258             | 0.003              | <0.001 | 0.700*      |
|                                             | sNS                            | 0.014                            | 0.017            | 0.005  | 0.005       | 0.044            | 0.230             | 0.048              | 0.011  | 0.626*      |

<sup>a</sup> Phylogenetic tree used for evolutionary model testing. *N*: number of isolates, STs, or genomes available for analysis.

<sup>b</sup> Artificial nectar codes are as in Table 1. A dagger after the code means that none of the evolutionary models performed substantially better than the others (i.e., all Akaike weights were  $<0.5$ ).

<sup>c</sup> Akaike weights obtained for the different models of trait evolution analyzed in this study. Asterisks denote the best model (i.e., the one yielding the greater Akaike weight) for each test condition.
